# Supplementary material
Source: Springer Nature journal article supplement (https://www.springermedizin.de/resource/supplementary/12891_2013_2110_MOESM1_ESM.pdf/9509444)

NO OA  
13%

Hand OA

31%

10%

25%

13%

2%

3%

3%

Knee OA

Hip OA

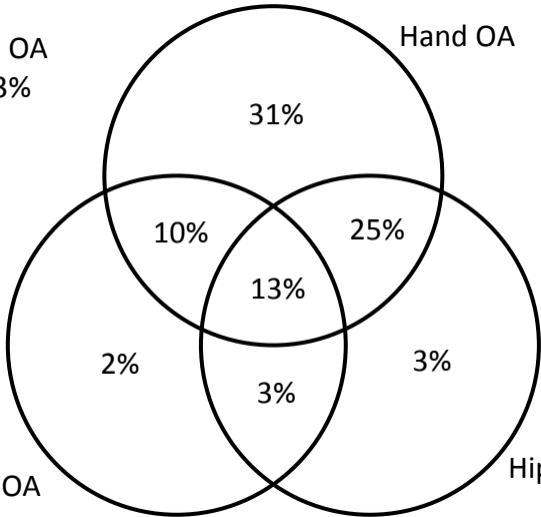

Supplement: MOESM1 [file 9509444]
